# Supplementary material for: Seasonal controls on methane flux components in a boreal peatland – combining plant removal and stable isotope analyses
Source: Copernicus journal article supplement (doi:10.5194/egusphere-2023-3098), 2024-01-04
Supplement: Supplementary file 1 [file egusphere-2023-3098-supplement.pdf]

| Date       | Replicate | Treatment | LightLevel | Season | Starttime | Endtime   | CH4flux | GA     | LAitot | LAlaer | LAIcSPal | DOC7 | DOC20 | DOC50 | Tsol17 | Tsol20 | d13Cemitted | d13C7 | d13C20 | d13C50 | CH4concC | CH4conc20 | CH4conc50 | WTD |
|------------|-----------|-----------|------------|--------|-----------|-----------|---------|--------|--------|--------|----------|------|-------|-------|--------|--------|-------------|-------|--------|--------|----------|-----------|-----------|-----|
| 2021-07-14 | 5         | PSV       | D          | Summer | 2021-07-1 | 2021-07-1 | 860.7   | LI7810 | 0.326  | 0.324  | 0.046    |      |       |       |        |        |             |       |        |        |          |           |           | 8   |
| 2021-07-14 | 5         | PSV       | 1          | Summer | 2021-07-1 | 2021-07-1 | 368.1   | LI7810 | 0.326  | 0.324  | 0.046    |      |       |       |        |        |             |       |        |        |          |           |           | 8   |
| 2021-07-14 | 5         | PSV       | L          | Summer | 2021-07-1 | 2021-07-1 | 2171.3  | LI7810 | 0.326  | 0.324  | 0.046    |      |       |       |        |        |             |       |        |        |          |           |           | 8   |
| 2021-07-14 | 5         | PSV       | 2          | Summer | 2021-07-1 | 2021-07-1 | 1518.0  | LI7810 | 0.326  | 0.324  | 0.046    |      |       |       |        |        |             |       |        |        |          |           |           | 8   |
| 2021-07-14 | 5         | PS        | 1          | Summer | 2021-07-1 | 2021-07-1 | 2224.8  | LI7810 |        |        |          |      |       |       |        |        |             |       |        |        |          |           |           | 8   |
| 2021-07-14 | 5         | PS        | 2          | Summer | 2021-07-1 | 2021-07-1 | 764.2   | LI7810 |        |        |          |      |       |       |        |        |             |       |        |        |          |           |           | 8   |
| 2021-07-14 | 5         | PS        | D          | Summer | 2021-07-1 | 2021-07-1 | 934.4   | LI7810 |        |        |          |      |       |       |        |        |             |       |        |        |          |           |           | 8   |
| 2021-07-15 | 3         | PSV       | 1          | Summer |           |           |         |        | 0.294  | 0.266  | 0.176    | 29.4 | 30.8  | 33.1  | 18.7   | 18.0   |             |       |        |        |          |           |           | 9   |
| 2021-07-15 | 3         | PSV       | L          | Summer |           |           |         |        | 0.294  | 0.266  | 0.176    | 29.4 | 30.8  | 33.1  | 18.7   | 18.0   |             |       |        |        |          |           |           | 9   |
| 2021-07-15 | 3         | PSV       | D          | Summer |           |           |         |        | 0.294  | 0.266  | 0.176    | 29.4 | 30.8  | 33.1  | 18.7   | 18.0   |             |       |        |        |          |           |           | 9   |
| 2021-07-15 | 3         | PS        | L          | Summer | 2021-07-1 | 2021-07-1 | 536.4   | LI7810 |        |        |          | 23.1 | 27.5  | 32.7  | 17.8   | 17.8   |             |       |        |        |          |           |           | 9   |
| 2021-07-15 | 3         | PS        | 1          | Summer | 2021-07-1 | 2021-07-1 | 757.4   | LI7810 |        |        |          | 23.1 | 27.5  | 32.7  | 17.8   | 17.8   |             |       |        |        |          |           |           | 9   |
| 2021-07-15 | 3         | P         | D          | Summer | 2021-07-1 | 2021-07-1 | 1639.4  | LI7810 |        |        |          | 27.5 | 32.7  | 17.8  | 17.8   |        |             |       |        |        |          |           |           | 9   |
| 2021-07-15 | 4         | PSV       | 1          | Summer | 2021-07-1 | 2021-07-1 | 1033.1  | LI7810 | 0.206  | 0.205  | 0.046    | 31.1 | 26.6  | 27.2  | 17.2   | 17.4   |             |       |        |        |          |           |           | 10  |
| 2021-07-15 | 4         | PSV       | L          | Summer | 2021-07-1 | 2021-07-1 | 301.1   | LI7810 | 0.206  | 0.205  | 0.046    | 31.1 | 26.6  | 27.2  | 17.2   | 17.4   |             |       |        |        |          |           |           | 10  |
| 2021-07-15 | 4         | PSV       | 2          | Summer | 2021-07-1 | 2021-07-1 | 573.5   | LI7810 | 0.206  | 0.205  | 0.046    | 31.1 | 26.6  | 27.2  | 17.2   | 17.4   |             |       |        |        |          |           |           | 10  |
| 2021-07-15 | 4         | PS        | L          | Summer | 2021-07-1 | 2021-07-1 | 637.9   | LI7810 |        |        |          | 29.8 | 24.2  | 31.2  | 16.6   | 16.8   |             |       |        |        |          |           |           | 10  |
| 2021-07-15 | 4         | PS        | 1          | Summer | 2021-07-1 | 2021-07-1 | 1523.6  | LI7810 |        |        |          | 29.8 | 24.2  | 31.2  | 16.6   | 16.8   |             |       |        |        |          |           |           | 10  |
| 2021-07-15 | 4         | PS        | 2          | Summer | 2021-07-1 | 2021-07-1 | 718.8   | LI7810 |        |        |          | 29.8 | 24.2  | 31.2  | 16.6   | 16.8   |             |       |        |        |          |           |           | 10  |
| 2021-07-15 | 4         | PS        | D          | Summer | 2021-07-1 | 2021-07-1 | 258.2   | LI7810 |        |        |          | 29.8 | 24.2  | 31.2  | 16.6   | 16.8   |             |       |        |        |          |           |           | 10  |
| 2021-07-15 | 4         | P         | D          | Summer | 2021-07-1 | 2021-07-1 | 197.7   | LI7810 |        |        |          | 24.2 | 31.2  | 16.6  | 16.8   |        |             |       |        |        |          |           |           | 10  |
| 2021-07-19 | 1         | PSV       | 2          | Summer | 2021-07-1 | 2021-07-1 | 134.0   | LI7810 | 0.232  | 0.211  | 0.131    | 28.9 | 32.3  | 25.8  | 16.5   | 16.8   |             |       |        |        |          |           |           | 8   |
| 2021-07-19 | 1         | PSV       | 1          | Summer | 2021-07-1 | 2021-07-1 | 123.0   | LI7810 | 0.232  | 0.211  | 0.131    | 28.9 | 32.3  | 25.8  | 16.5   | 16.8   |             |       |        |        |          |           |           | 8   |
| 2021-07-19 | 1         | PSV       | D          | Summer | 2021-07-1 | 2021-07-1 | 140.0   | LI7810 | 0.232  | 0.211  | 0.131    | 28.9 | 32.3  | 25.8  | 16.5   | 16.8   |             |       |        |        |          |           |           | 8   |
| 2021-07-19 | 1         | PS        | 1          | Summer | 2021-07-1 | 2021-07-1 | 35.7    | LI7810 |        |        |          | 27.8 | 32.4  | 25.8  | 17.9   | 18.0   |             |       |        |        |          |           |           | 8   |
| 2021-07-19 | 1         | PS        | 2          | Summer | 2021-07-1 | 2021-07-1 | 19.3    | LI7810 |        |        |          | 27.8 | 32.4  | 25.8  | 17.9   | 18.0   |             |       |        |        |          |           |           | 8   |
| 2021-07-19 | 1         | PS        | L          | Summer | 2021-07-1 | 2021-07-1 | 47.1    | LI7810 |        |        |          | 27.8 | 32.4  | 25.8  | 17.9   | 18.0   |             |       |        |        |          |           |           | 8   |
| 2021-07-19 | 1         | P         | D          | Summer | 2021-07-1 | 2021-07-1 | 274.9   | LI7810 |        |        |          | 32.4 | 25.8  | 17.9  | 18.0   |        |             |       |        |        |          |           |           | 8   |
| 2021-07-27 | 5         | PSV       | L          | Summer | 2021-07-2 | 2021-07-2 | 2094.8  | LI7810 | 0.197  | 0.196  | 0.051    |      |       |       |        |        |             |       |        |        |          |           |           | 11  |
| 2021-07-27 | 5         | PSV       | D          | Summer | 2021-07-2 | 2021-07-2 | 574.5   | LI7810 | 0.197  | 0.196  | 0.051    |      |       |       |        |        |             |       |        |        |          |           |           | 11  |
| 2021-07-27 | 5         | PS        | L          | Summer | 2021-07-2 | 2021-07-2 | 208.4   | LI7810 |        |        |          |      |       |       |        |        |             |       |        |        |          |           |           | 11  |
| 2021-07-27 | 5         | PS        | D          | Summer | 2021-07-2 | 2021-07-2 | 160.4   | LI7810 |        |        |          |      |       |       |        |        |             |       |        |        |          |           |           | 11  |
| 2021-07-27 | 5         | P         | D          | Summer | 2021-07-2 | 2021-07-2 | 1114.1  | LI7810 |        |        |          |      |       |       |        |        |             |       |        |        |          |           |           | 11  |
| 2021-07-28 | 4         | PSV       | D          | Summer | 2021-07-2 | 2021-07-2 | 168.5   | LI7810 | 0.151  | 0.149  | 0.051    | 37.3 | 27.8  | 27.8  | 16.5   | 17.6   |             |       |        |        |          |           |           | 12  |
| 2021-07-28 | 4         | PSV       | L          | Summer | 2021-07-2 | 2021-07-2 | 179.2   | LI7810 | 0.151  | 0.149  | 0.051    | 37.3 | 27.8  | 27.8  | 16.5   | 17.6   |             |       |        |        |          |           |           | 12  |
| 2021-07-28 | 4         | PS        | L          | Summer | 2021-07-2 | 2021-07-2 | 149.1   | LI7810 |        |        |          | 28.3 | 28.1  | 29.8  | 16.0   | 17.3   |             |       |        |        |          |           |           | 12  |
| 2021-07-28 | 4         | PS        | D          | Summer | 2021-07-2 | 2021-07-2 | 239.7   | LI7810 |        |        |          | 28.3 | 28.1  | 29.8  | 16.0   | 17.3   |             |       |        |        |          |           |           | 12  |
| 2021-07-28 | 4         | P         | L          | Summer |           |           |         |        |        |        |          | 25.2 | 30.6  | 17.3  |        |        |             |       |        |        |          |           |           | 12  |
| 2021-07-28 | 4         | P         | D          | Summer | 2021-07-2 | 2021-07-2 | 787.6   | LI7810 |        |        |          | 28.1 | 29.8  | 16.0  | 17.3   |        |             |       |        |        |          |           |           | 12  |
| 2021-07-30 | 3         | PSV       | L          | Summer | 2021-07-3 | 2021-07-3 | 163.7   | LI7810 | 0.249  | 0.215  | 0.164    | 34.6 | 30.9  | 29.1  | 17.5   | 18.2   |             |       |        |        |          |           |           | 7   |
| 2021-07-30 | 3         | PSV       | D          | Summer | 2021-07-3 | 2021-07-3 | 468.6   | LI7810 | 0.249  | 0.215  | 0.164    | 34.6 | 30.9  | 29.1  | 17.5   | 18.2   |             |       |        |        |          |           |           | 7   |
| 2021-07-30 | 3         | PS        | L          | Summer | 2021-07-3 | 2021-07-3 | 69.8    | LI7810 |        |        |          | 32.5 | 28.0  | 29.2  | 17.2   | 17.9   |             |       |        |        |          |           |           | 7   |
| 2021-07-30 | 3         | PS        | D          | Summer | 2021-07-3 | 2021-07-3 | 63.4    | LI7810 |        |        |          | 32.5 | 28.0  | 29.2  | 17.2   | 17.9   |             |       |        |        |          |           |           | 7   |
| 2021-07-30 | 3         | P         | D          | Summer | 2021-07-3 | 2021-07-3 | 105.9   | LI7810 |        |        |          | 32.5 | 28.0  | 29.2  | 17.2   | 17.9   |             |       |        |        |          |           |           | 7   |
| 2021-08-02 | 1         | PSV       | D          | Summer | 2021-08-1 | 2021-08-1 | 1783.5  | LI7810 |        |        |          | 38.0 | 29.2  | 17.2  | 17.9   |        |             |       |        |        |          |           |           | 7   |
| 2021-08-02 | 1         | P         | D          | Summer | 2021-08-1 | 2021-08-1 | 138.0   | LI7810 | 0.231  | 0.209  | 0.130    | 37.6 | 34.8  | 30.9  | 16.5   | 17.9   |             |       |        |        |          |           |           | 8   |
| 2021-08-02 | 1         | PSV       | L          | Summer | 2021-08-1 | 2021-08-1 | 119.3   | LI7810 | 0.231  | 0.209  | 0.130    | 37.6 | 34.8  | 30.9  | 16.5   | 17.9   |             |       |        |        |          |           |           | 8   |
| 2021-08-02 | 1         | PS        | L          | Summer | 2021-08-1 | 2021-08-1 | 20.1    | LI7810 |        |        |          | 28.8 | 28.5  | 33.4  | 18.0   | 18.0   |             |       |        |        |          |           |           | 8   |
| 2021-08-02 | 1         | PS        | D          | Summer | 2021-08-1 | 2021-08-1 | 8.3     | LI7810 |        |        |          | 28.8 | 28.5  | 33.4  | 18.0   | 18.0   |             |       |        |        |          |           |           | 8   |
| 2021-08-02 | 1         | P         | D          | Summer | 2021-08-1 | 2021-08-1 | 286.9   | LI7810 |        |        |          | 28.5 | 33.4  | 18.0  | 18.0   |        |             |       |        |        |          |           |           | 8   |
| 2021-08-02 | 2         | PSV       | L          | Summer | 2021-08-1 | 2021-08-1 | 390.4   | LI7810 | 0.189  | 0.178  | 0.111    |      |       |       |        |        |             |       |        |        |          |           |           | 6   |
| 2021-08-02 | 2         | PSV       | D          | Summer | 2021-08-1 | 2021-08-1 | 329.3   | LI7810 | 0.189  | 0.178  | 0.111    |      |       |       |        |        |             |       |        |        |          |           |           | 6   |
| 2021-08-02 | 2         | PS        | L          | Summer | 2021-08-1 | 2021-08-1 | 33.6    | LI7810 |        |        |          |      |       |       |        |        |             |       |        |        |          |           |           | 6   |
| 2021-08-02 | 2         | PS        | D          | Summer | 2021-08-1 | 2021-08-1 | 21.1    | LI7810 |        |        |          |      |       |       |        |        |             |       |        |        |          |           |           | 6   |
| 2021-08-02 | 2         | P         | D          | Summer | 2021-08-1 | 2021-08-1 | 2077.5  | LI7810 |        |        |          |      |       |       |        |        |             |       |        |        |          |           |           | 6   |
| 2021-10-28 | 4         | PSV       | L          | Fall   | 2021-10-2 | 2021-10-2 | 16.0    | LI7810 |        |        |          |      | 31.1  |       | 5.8    |        |             |       |        |        |          |           |           | 6   |
| 2021-10-28 | 4         | PSV       | D          | Fall   | 2021-10-2 | 2021-10-2 | 12.8    | LI7810 |        |        |          |      | 31.1  |       | 5.8    |        |             |       |        |        |          |           |           | 6   |
| 2021-10-28 | 4         | PS        | L          | Fall   | 2021-10-2 | 2021-10-2 | 4.8     | LI7810 |        |        |          |      | 27.1  |       | 5.8    |        |             |       |        |        |          |           |           | 6   |
| 2021-10-28 | 4         | PS        | D          | Fall   | 2021-10-2 | 2021-10-2 | 19.8    | LI7810 |        |        |          |      | 27.1  |       | 5.8    |        |             |       |        |        |          |           |           | 6   |
| 2021-10-28 | 4         | P         | L          | Fall   | 2021-10-2 | 2021-10-2 | 71.9    | LI7810 |        |        |          |      | 27.1  |       | 5.8    |        |             |       |        |        |          |           |           | 6   |
| 2021-10-28 | 4         | P         | D          | Fall   | 2021-10-2 | 2021-10-2 | 115.1   | LI7810 |        |        |          |      | 27.1  |       | 5.8    |        |             |       |        |        |          |           |           | 6   |
| 2021-10-29 | 1         | PSV       | L          | Fall   | 2021-10-2 | 2021-10-2 | 27.9    | LI7810 |        |        |          |      | 28.2  |       |        |        |             |       |        |        |          |           |           | 6   |
| 2021-10-29 | 1         | PSV       | D          | Fall   | 2021-10-2 | 2021-10-2 | 26.1    | LI7810 |        |        |          |      | 28.2  |       |        |        |             |       |        |        |          |           |           | 6   |
| 2021-10-29 | 1         | PS        | L          | Fall   | 2021-10-2 | 2021-10-2 | 10.9    | LI7810 |        |        |          |      | 31.8  |       |        |        |             |       |        |        |          |           |           | 6   |
| 2021-10-29 | 1         | PS        | D          | Fall   | 2021-10-2 | 2021-10-2 | 9.7     | LI7810 |        |        |          |      | 31.8  |       |        |        |             |       |        |        |          |           |           | 6   |
| 2021-10-29 | 1         | P         | L          | Fall   | 2021-10-2 | 2021-10-2 | 36.1    | LI7810 |        |        |          |      | 31.8  |       |        |        |             |       |        |        |          |           |           | 6   |
| 2021-10-29 | 1         | P         | D          | Fall   | 2021-10-2 | 2021-10-2 | 92.4    | LI7810 |        |        |          |      | 31.8  |       |        |        |             |       |        |        |          |           |           | 6   |
| 2021-10-29 | 3         | PSV       | L          | Fall   | 2021-10-2 | 2021-10-2 | 45.0    | LI7810 |        |        |          |      | 22.9  |       |        |        |             |       |        |        |          |           |           | 6   |
| 2021-10-29 | 3         | PSV       | D          | Fall   | 2021-10-2 | 2021-10-2 | 52.5    | LI7810 |        |        |          |      | 22.9  |       |        |        |             |       |        |        |          |           |           |     |

|            |   |     |   |        |           |           |        |        |       |       |       |      |      |      |      |      |       |       |       |       |       |       |       |    |
|------------|---|-----|---|--------|-----------|-----------|--------|--------|-------|-------|-------|------|------|------|------|------|-------|-------|-------|-------|-------|-------|-------|----|
| 2022-06-25 | 1 | PSV | L | Summer | 2022-06-2 | 2022-06-2 | 222.6  | LI7810 | 0.201 | 0.177 | 0.112 | 26.7 | 29.1 | 27.6 | 17.3 | 16.1 | -78.0 | -51.6 | -59.8 | -69.0 | 27.1  | 146.0 | 176.3 | 6  |
| 2022-06-25 | 1 | PSV | L | Summer | 2022-06-2 | 2022-06-2 | 159.1  | LI7810 | 0.201 | 0.177 | 0.112 | 26.7 | 29.1 | 27.6 | 17.3 | 16.1 | -78.0 | -51.6 | -59.8 | -69.0 | 27.1  | 146.0 | 176.3 | 6  |
| 2022-06-25 | 1 | PSV | L | Summer | 2022-06-2 | 2022-06-2 | 155.6  | LI7810 | 0.201 | 0.177 | 0.112 | 26.7 | 29.1 | 27.6 | 17.3 | 16.1 | -78.0 | -51.6 | -59.8 | -69.0 | 27.1  | 146.0 | 176.3 | 6  |
| 2022-06-25 | 1 | P   | L | Summer | 2022-06-2 | 2022-06-2 | 46.8   | LI7810 |       |       |       | 28.8 | 30.7 | 25.9 | 16.2 | 15.8 | -7.8  | -61.8 | -66.6 | -69.1 | 224.8 | 177.6 | 241.9 | 6  |
| 2022-06-29 | 4 | PSV | L | Summer | 2022-06-2 | 2022-06-2 |        |        | 0.134 | 0.133 | 0.044 | 26.6 | 24.4 | 26.6 | 20.1 | 17.4 | -63.2 | -63.3 | -69.6 | -69.4 | 286.0 | 430.2 | 220.2 | 11 |
| 2022-06-29 | 4 | PSV | L | Summer | 2022-06-2 | 2022-06-2 | 12.7   | MGGA   |       |       |       | 23.2 | 21.0 | 26.7 | 19.6 | 17.2 | -67.3 | -65.1 | -71.9 | -70.6 | 202.2 | 317.3 | 352.6 | 11 |
| 2022-06-29 | 4 | PS  | L | Summer | 2022-06-2 | 2022-06-2 | 438.8  | MGGA   |       |       |       | 23.2 | 21.0 | 26.7 | 19.6 | 17.2 | -67.3 | -65.1 | -71.9 | -70.6 | 202.2 | 317.3 | 352.6 | 11 |
| 2022-06-29 | 4 | PS  | L | Summer | 2022-06-2 | 2022-06-2 | 320.9  | MGGA   |       |       |       | 23.2 | 21.0 | 26.7 | 19.6 | 17.2 | -67.3 | -65.1 | -71.9 | -70.6 | 202.2 | 317.3 | 352.6 | 11 |
| 2022-06-29 | 4 | PS  | L | Summer | 2022-06-2 | 2022-06-2 | 27.6   | MGGA   |       |       |       | 23.2 | 21.0 | 26.7 | 19.6 | 17.2 | -67.3 | -65.1 | -71.9 | -70.6 | 202.2 | 317.3 | 352.6 | 11 |
| 2022-06-29 | 5 | PSV | L | Summer | 2022-06-2 | 2022-06-2 |        |        | 0.257 | 0.257 | 0.030 | 29.4 | 24.1 | 30.3 | 20.7 | 17.5 | -72.2 | -55.3 | -66.1 | -70.1 | 25.6  | 131.3 | 443.9 | 6  |
| 2022-06-29 | 5 | PS  | L | Summer | 2022-06-2 | 2022-06-2 | 349.0  | LI7810 |       |       |       | 25.3 | 26.3 | 31.8 | 19.7 | 16.9 | -71.4 | -30.6 | -70.6 | -68.8 | 2.8   | 499.1 | 541.0 | 6  |
| 2022-06-29 | 5 | PS  | L | Summer | 2022-06-2 | 2022-06-2 | 275.9  | LI7810 |       |       |       | 25.3 | 26.3 | 31.8 | 19.7 | 16.9 | -71.4 | -30.6 | -70.6 | -68.8 | 2.8   | 499.1 | 541.0 | 6  |
| 2022-06-29 | 5 | PS  | L | Summer | 2022-06-2 | 2022-06-2 | 147.3  | LI7810 |       |       |       | 25.3 | 26.3 | 31.8 | 19.7 | 16.9 | -71.4 | -30.6 | -70.6 | -68.8 | 2.8   | 499.1 | 541.0 | 6  |
| 2022-06-29 | 5 | PS  | L | Summer | 2022-06-2 | 2022-06-2 | 663.5  | LI7810 |       |       |       | 25.3 | 26.3 | 31.8 | 19.7 | 16.9 | -71.4 | -30.6 | -70.6 | -68.8 | 2.8   | 499.1 | 541.0 | 6  |
| 2022-06-29 | 5 | PS  | L | Summer | 2022-06-2 | 2022-06-2 | 633.9  | LI7810 |       |       |       | 25.3 | 26.3 | 31.8 | 19.7 | 16.9 | -71.4 | -30.6 | -70.6 | -68.8 | 2.8   | 499.1 | 541.0 | 6  |
| 2022-06-29 | 5 | PS  | L | Summer | 2022-06-2 | 2022-06-2 | 589.2  | LI7810 |       |       |       | 25.3 | 26.3 | 31.8 | 19.7 | 16.9 | -71.4 | -30.6 | -70.6 | -68.8 | 2.8   | 499.1 | 541.0 | 6  |
| 2022-06-29 | 5 | P   | L | Summer | 2022-06-2 | 2022-06-2 |        |        |       |       |       | 26.3 | 31.8 | 19.7 | 16.9 |      | -52.7 | -70.6 | -68.8 |       |       | 499.1 | 541.0 | 6  |
| 2022-07-04 | 4 | PSV | L | Summer | 2022-07-0 | 2022-07-0 | 846.8  | MGGA   | 0.156 | 0.154 | 0.055 | 26.6 | 24.4 | 26.6 | 20.1 | 17.4 | -63.2 | -63.3 | -69.6 | -69.4 | 286.0 | 430.2 | 220.2 | 11 |
| 2022-07-04 | 4 | PSV | D | Summer | 2022-07-0 | 2022-07-0 | 1025.4 | MGGA   | 0.156 | 0.154 | 0.055 | 26.6 | 24.4 | 26.6 | 20.1 | 17.4 | -63.2 | -63.3 | -69.6 | -69.4 | 286.0 | 430.2 | 220.2 | 11 |
| 2022-07-04 | 4 | PS  | D | Summer | 2022-07-0 | 2022-07-0 | 65.8   | MGGA   |       |       |       | 23.2 | 21.0 | 26.7 | 19.6 | 17.2 | -65.1 | -71.9 | -70.6 | 202.2 |       | 317.3 | 352.6 | 11 |
| 2022-07-04 | 4 | PS  | L | Summer | 2022-07-0 | 2022-07-0 | 31.9   | MGGA   |       |       |       | 23.2 | 21.0 | 26.7 | 19.6 | 17.2 | -67.3 | -65.1 | -71.9 | -70.6 | 202.2 | 317.3 | 352.6 | 11 |
| 2022-07-04 | 4 | P   | L | Summer | 2022-07-0 | 2022-07-0 | 318.8  | MGGA   |       |       |       | 21.0 | 26.7 | 19.6 | 17.2 |      | -71.9 | -70.6 |       |       |       | 317.3 | 352.6 | 11 |
| 2022-07-04 | 4 | P   | D | Summer | 2022-07-0 | 2022-07-0 | 123.1  | MGGA   |       |       |       | 21.0 | 26.7 | 19.6 | 17.2 |      | -71.9 | -70.6 |       |       |       | 317.3 | 352.6 | 11 |
| 2022-07-04 | 5 | PSV | L | Summer | 2022-07-0 | 2022-07-0 | 234.0  | LI7810 | 0.278 | 0.278 | 0.034 | 29.4 | 24.1 | 30.3 | 20.7 | 17.5 | -72.2 | -55.3 | -66.1 | -70.1 | 25.6  | 131.3 | 443.9 | 8  |
| 2022-07-04 | 5 | PSV | D | Summer | 2022-07-0 | 2022-07-0 | 349.7  | LI7810 | 0.278 | 0.278 | 0.034 | 29.4 | 24.1 | 30.3 | 20.7 | 17.5 | -72.2 | -55.3 | -66.1 | -70.1 | 25.6  | 131.3 | 443.9 | 8  |
| 2022-07-04 | 5 | PS  | L | Summer | 2022-07-0 | 2022-07-0 | 218.8  | LI7810 |       |       |       | 25.3 | 26.3 | 31.8 | 19.7 | 16.9 | -71.4 | -30.6 | -70.6 | -68.8 | 2.8   | 499.1 | 541.0 | 8  |
| 2022-07-04 | 5 | PS  | D | Summer | 2022-07-0 | 2022-07-0 | 741.0  | LI7810 |       |       |       | 25.3 | 26.3 | 31.8 | 19.7 | 16.9 | -71.4 | -30.6 | -70.6 | -68.8 | 2.8   | 499.1 | 541.0 | 8  |
| 2022-07-04 | 5 | P   | L | Summer | 2022-07-0 | 2022-07-0 | 856.1  | LI7810 |       |       |       | 26.3 | 31.8 | 19.7 | 16.9 |      | -52.7 | -70.6 | -68.8 |       |       | 499.1 | 541.0 | 8  |
| 2022-07-04 | 5 | P   | D | Summer | 2022-07-0 | 2022-07-0 | 313.9  | LI7810 |       |       |       | 26.3 | 31.8 | 19.7 | 16.9 |      | -52.7 | -70.6 | -68.8 |       |       | 499.1 | 541.0 | 8  |
| 2022-07-04 | 5 | P   | L | Summer | 2022-07-0 | 2022-07-0 |        |        |       |       |       | 26.3 | 31.8 | 19.7 | 16.9 |      | -52.7 | -70.6 | -68.8 |       |       | 499.1 | 541.0 | 8  |
| 2022-07-05 | 3 | PSV | L | Summer | 2022-07-0 | 2022-07-0 |        |        | 0.246 | 0.224 | 0.190 | 22.2 | 27.8 | 26.1 | 20.3 | 17.9 | -71.8 | -47.1 | -58.8 | -65.0 | 28.1  | 206.9 | 140.4 | 8  |
| 2022-07-05 | 3 | PSV | D | Summer | 2022-07-0 | 2022-07-0 | 268.9  | MGGA   |       |       |       | 22.1 | 28.0 | 26.7 | 20.3 | 17.5 | -61.3 | -59.6 | -66.5 | -69.4 | 244.1 | 220.5 | 270.3 | 8  |
| 2022-07-05 | 3 | PS  | D | Summer | 2022-07-0 | 2022-07-0 | 28.9   | MGGA   |       |       |       | 22.1 | 28.0 | 26.7 | 20.3 | 17.5 | -59.6 | -66.5 | -69.4 | 244.1 | 220.5 | 270.3 | 8     |    |
| 2022-07-05 | 3 | P   | D | Summer | 2022-07-0 | 2022-07-0 | 219.8  | MGGA   |       |       |       | 28.0 | 26.7 | 20.3 | 17.5 |      | -60.3 | -66.5 | -69.4 |       |       | 220.5 | 270.3 | 8  |
| 2022-07-05 | 3 | P   | L | Summer | 2022-07-0 | 2022-07-0 | 298.9  | MGGA   |       |       |       | 28.0 | 26.7 | 20.3 | 17.5 |      | -60.3 | -66.5 | -69.4 |       |       | 220.5 | 270.3 | 8  |
| 2022-07-08 | 1 | PSV | D | Summer | 2022-07-0 | 2022-07-0 | 155.2  | LI7810 | 0.290 | 0.265 | 0.162 | 26.7 | 29.1 | 27.6 | 17.3 | 16.1 | -78.0 | -51.6 | -59.8 | -69.0 | 27.1  | 146.0 | 176.3 | 9  |
| 2022-07-08 | 1 | PSV | L | Summer | 2022-07-0 | 2022-07-0 | 111.2  | LI7810 | 0.290 | 0.265 | 0.162 | 26.7 | 29.1 | 27.6 | 17.3 | 16.1 | -78.0 | -51.6 | -59.8 | -69.0 | 27.1  | 146.0 | 176.3 | 9  |
| 2022-07-08 | 1 | PS  | L | Summer | 2022-07-0 | 2022-07-0 | 3.5    | LI7810 |       |       |       | 28.8 | 30.7 | 25.9 | 16.2 | 15.8 | -7.8  | -61.8 | -66.6 | -69.1 | 224.8 | 177.6 | 241.9 | 9  |
| 2022-07-08 | 1 | PS  | D | Summer | 2022-07-0 | 2022-07-0 | 15.9   | LI7810 |       |       |       | 28.8 | 30.7 | 25.9 | 16.2 | 15.8 | -7.8  | -61.8 | -66.6 | -69.1 | 224.8 | 177.6 | 241.9 | 9  |
| 2022-07-08 | 1 | P   | L | Summer | 2022-07-0 | 2022-07-0 | 119.0  | LI7810 |       |       |       | 30.7 | 25.9 | 16.2 | 15.8 |      | -57.8 | -66.6 | -69.1 |       |       | 177.6 | 241.9 | 9  |
| 2022-07-08 | 1 | P   | D | Summer | 2022-07-0 | 2022-07-0 | 88.5   | LI7810 |       |       |       | 30.7 | 25.9 | 16.2 | 15.8 |      | -57.8 | -66.6 | -69.1 |       |       | 177.6 | 241.9 | 9  |
| 2022-07-08 | 1 | P   | D | Summer | 2022-07-0 | 2022-07-0 | 72.7   | LI7810 |       |       |       | 30.7 | 25.9 | 16.2 | 15.8 |      | -57.8 | -66.6 | -69.1 |       |       | 177.6 | 241.9 | 9  |
| 2022-07-08 | 2 | PSV | L | Summer | 2022-07-0 | 2022-07-0 | 638.6  | MGGA   | 0.294 | 0.292 | 0.233 | 17.6 | 13.2 | 18.2 | 16.9 | 15.1 | -68.3 | -64.6 | -58.8 | -63.5 | 148.6 | 211.4 | 230.4 | 5  |
| 2022-07-08 | 2 | PSV | D | Summer | 2022-07-0 | 2022-07-0 | 612.1  | MGGA   | 0.294 | 0.292 | 0.233 | 17.6 | 13.2 | 18.2 | 16.9 | 15.1 | -68.3 | -64.6 | -58.8 | -63.5 | 148.6 | 211.4 | 230.4 | 5  |
| 2022-07-08 | 2 | PS  | D | Summer | 2022-07-0 | 2022-07-0 | 40.2   | MGGA   |       |       |       | 16.0 | 16.4 | 19.9 | 15.5 | 15.0 | -61.4 | -65.4 | -66.5 | -68.7 | 181.7 | 119.3 | 345.4 | 5  |
| 2022-07-08 | 2 | PS  | L | Summer | 2022-07-0 | 2022-07-0 | 24.8   | MGGA   |       |       |       | 16.0 | 16.4 | 19.9 | 15.5 | 15.0 | -61.4 | -65.4 | -66.5 | -68.7 | 181.7 | 119.3 | 345.4 | 5  |
| 2022-07-08 | 2 | P   | D | Summer | 2022-07-0 | 2022-07-0 | 1358.4 | MGGA   |       |       |       | 16.4 | 19.9 | 15.5 | 15.0 |      | -61.4 | -65.4 | -66.5 | -68.7 |       | 119.3 | 345.4 | 5  |
| 2022-09-10 | 1 | PSV | D | Fall   | 2022-09-1 | 2022-09-1 | 91.1   | LI7810 | 0.098 | 0.084 | 0.057 | 32.5 | 17.5 | 26.8 | 9.4  | 10.4 | -59.2 | -61.6 | -67.1 | 48.2  | 148.9 | 131.8 | 7     |    |
| 2022-09-10 | 1 | PSV | L | Fall   | 2022-09-1 | 2022-09-1 | 105.9  | LI7810 | 0.098 | 0.084 | 0.057 | 32.5 | 17.5 | 26.8 | 9.4  | 10.4 | -79.3 | -59.2 | -61.6 | -67.1 | 48.2  | 142.9 | 131.8 | 7  |
| 2022-09-10 | 1 | PS  | L | Fall   | 2022-09-1 | 2022-09-1 | 9.9    | LI7810 |       |       |       | 33.9 | 20.0 | 20.8 | 10.6 | 10.8 | -55.5 | -59.7 | -66.0 | -67.7 | 127.0 | 347.2 | 220.0 | 7  |
| 2022-09-10 | 1 | PS  | D | Fall   | 2022-09-1 | 2022-09-1 | 7.6    | LI7810 |       |       |       | 33.9 | 20.0 | 20.8 | 10.6 | 10.8 | -59.7 | -66.0 | -67.7 | 127.0 |       | 347.2 | 220.0 | 7  |
| 2022-09-10 | 1 | P   | L | Fall   | 2022-09-1 | 2022-09-1 | 172.2  | LI7810 |       |       |       | 20.0 | 20.8 | 10.6 | 10.8 |      | -62.1 | -66.0 | -67.7 |       |       | 347.2 | 220.0 | 7  |
| 2022-09-10 | 2 | PSV | L | Fall   | 2022-09-1 | 2022-09-1 | 269.1  | LI7810 | 0.153 | 0.153 | 0.114 | 18.1 | 17.7 | 18.2 | 10.6 | 11.5 | -75.0 | -63.0 | -59.6 | -64.4 | 124.2 | 169.3 | 175.3 | 3  |
| 2022-09-10 | 2 | PSV | D | Fall   | 2022-09-1 | 2022-09-1 | 276.9  | LI7810 | 0.153 | 0.153 | 0.114 | 18.1 | 17.7 | 18.2 | 10.6 | 11.5 | -75.0 | -63.0 | -59.6 | -64.4 | 124.2 | 169.3 | 175.3 | 3  |
| 2022-09-10 | 2 | PS  | L | Fall   | 2022-09-1 | 2022-09-1 | 14.5   | LI7810 |       |       |       | 15.3 | 17.3 | 18.5 | 9.2  | 9.7  | -42.2 | -70.3 | -70.5 | -69.0 | 397.7 | 416.7 | 481.4 | 3  |
| 2022-09-10 | 2 | P   | L | Fall   | 2022-09-1 | 2022-09-1 | 11.0   | LI7810 |       |       |       | 15.3 | 17.3 | 18.5 | 9.2  | 9.7  | -70.7 | -70.3 | -70.5 | -69.0 | 397.7 | 416.7 | 481.4 | 3  |
| 2022-09-10 | 2 | P   | D | Fall   | 2022-09-1 | 2022-09-1 | 1513.1 | LI7810 |       |       |       |      |      |      |      |      |       |       |       |       |       |       |       |    |

Contact info and dataset owner:  
 Katharina Jentsch  
 Permafrost Section, Alfred Wegener Institute, Potsdam, Germany  
[katharina.jentsch@awi.de](mailto:katharina.jentsch@awi.de)

| Parameter name                                                              | Short name | Unit                | Principal investigator | Comment                                                                                                                                    |
|-----------------------------------------------------------------------------|------------|---------------------|------------------------|--------------------------------------------------------------------------------------------------------------------------------------------|
| Measurement date                                                            | Date       | yyyy-mm-dd          | Katharina Jentsch      |                                                                                                                                            |
| Spatial replicate id                                                        | Replicate  |                     | Katharina Jentsch      |                                                                                                                                            |
| Vegetation treatment                                                        | Treatment  |                     | Katharina Jentsch      | PS: intact vegetation; PS-vascular plants removed - Sphagnum moss layer remaining; F: all vegetation removed - only bare peat remaining    |
| Light level                                                                 | LightLevel |                     | Katharina Jentsch      | L: light; I: single shading; 2: double shading; D: dark                                                                                    |
| Season                                                                      | Season     |                     | Katharina Jentsch      |                                                                                                                                            |
| Datetime of start of chamber measurement                                    | Starttime  | yyyy-mm-ddTHH:MM:SS | Katharina Jentsch      |                                                                                                                                            |
| Datetime of end of chamber measurement                                      | Endtime    | yyyy-mm-ddTHH:MM:SS | Katharina Jentsch      |                                                                                                                                            |
| CH <sub>4</sub> flux                                                        | CH4flux    | mgm <sup>-2</sup>   | Katharina Jentsch      |                                                                                                                                            |
| Gas analyzer model                                                          | GA         |                     | Katharina Jentsch      | LI-COR CH <sub>4</sub> , CO <sub>2</sub> , H <sub>2</sub> O Trace Gas Analyzer (817180); LGR Microportable Greenhouse Gas Analyzer (MAGIA) |
| Total leaf area of all vascular plants                                      | LAreaT     |                     | Katharina Jentsch      |                                                                                                                                            |
| Leaf area of all aerenchymatous plants                                      | LAreaP     |                     | Katharina Jentsch      |                                                                                                                                            |
| Leaf area index of Sphagnum Palustris                                       | LAI_SpP    |                     | Katharina Jentsch      |                                                                                                                                            |
| Dissolved organic carbon at 7 cm depth                                      | DOC7       | mgL <sup>-1</sup>   | Katharina Jentsch      |                                                                                                                                            |
| Dissolved organic carbon at 20 cm depth                                     | DOC20      | mgL <sup>-1</sup>   | Katharina Jentsch      |                                                                                                                                            |
| Dissolved organic carbon at 50 cm depth                                     | DOC50      | mgL <sup>-1</sup>   | Katharina Jentsch      |                                                                                                                                            |
| Peat temperature at 7 cm depth                                              | Temp7      | °C                  | Katharina Jentsch      |                                                                                                                                            |
| Peat temperature at 20 cm depth                                             | Temp20     | °C                  | Katharina Jentsch      |                                                                                                                                            |
| δ <sup>13</sup> C <sub>org</sub> in peat                                    | d13Corg    | ‰                   | Katharina Jentsch      |                                                                                                                                            |
| δ <sup>13</sup> C <sub>CH<sub>4</sub></sub> at 7 cm depth                   | d13C7      | ‰                   | Katharina Jentsch      |                                                                                                                                            |
| δ <sup>13</sup> C <sub>CH<sub>4</sub></sub> at 20 cm depth                  | d13C20     | ‰                   | Katharina Jentsch      |                                                                                                                                            |
| δ <sup>13</sup> C <sub>CH<sub>4</sub></sub> at 50 cm depth                  | d13C50     | ‰                   | Katharina Jentsch      |                                                                                                                                            |
| concentration of dissolved CH <sub>4</sub> in the pore water at 7 cm depth  | CH4conc7   | mmolL <sup>-1</sup> | Katharina Jentsch      |                                                                                                                                            |
| concentration of dissolved CH <sub>4</sub> in the pore water at 20 cm depth | CH4conc20  | mmolL <sup>-1</sup> | Katharina Jentsch      |                                                                                                                                            |
| concentration of dissolved CH <sub>4</sub> in the pore water at 50 cm depth | CH4conc50  | mmolL <sup>-1</sup> | Katharina Jentsch      |                                                                                                                                            |
| Water table depth                                                           | WTD        | cm                  | Katharina Jentsch      | negative values indicate water table levels above the soil surface                                                                         |
